# Supplementary material for: Genetic Regulation of Caenorhabditis elegans Lysosome Related Organelle Function
Source: PubMed Central journal article supplement (PMC3812091; doi:10.1371/journal.pgen.1003908), 2013-10-24

**A**

|           |     |                                                                                   |     |
|-----------|-----|-----------------------------------------------------------------------------------|-----|
| ScAVT3    | 1   | [255]GEDLSEEEEEETEEPEE-----EALETESTQLVSRHGHRP-----HKSSTVKAIVLLKLSFVGTGLVFL        | 318 |
| MmQ8BHK3  | 1   | MSVTKSARSQVATPLNLDL---PESAKKLQSQDPSANGSSSES--KTKTGITGFTLVHLVKGNMGTGILGL           | 70  |
| HsSLC36A2 | 1   | MSVTKSTEGPQGAVALKLDLmspPESAKLENKNDSTFLDESSESagIKTKTGITVFPQALHLVKGNMGTGILGL        | 75  |
| CeSKAT-1  | 1   | ---MSEEEGRRAVTVGEDA-----ESMN-DGRALV-QPPARSG-----DVITPTRAVLTLKSKSMFNAGCFSL         | 58  |
| ScAVT3    | 319 | PKAFHNGWGFALCCLLSICALISYGCVSLITTKDKV-----GVDGYGDMGRILYGPKMKFALLSSIA               | 381 |
| MmQ8BHK3  | 71  | PLAVKNAGILMGLSLLVGLIACHCMHILVRCARFCHRLNKPMDYDGTVMHGLAFSPNANLQNHAWGRVVSFFLI        | 150 |
| HsSLC36A2 | 76  | PLAVKNAGILMGLSLLVGMFIAACHCMHILVRCARFCKRLNKPMDYDGTVMHGLEANPNAWLQNHAWGRHVSFFLI      | 155 |
| CeSKAT-1  | 59  | PYAWKLGGLVSVFMSFVIAGLNWGHILVRASQHLAKKSDRSALDYGHFAKVKCDYSDIRFLRNNKAVMYFVMTLIL      | 138 |
| ScAVT3    | 382 | LSQIGFSAAYTVFTATNLQVSENFH-----LKPQSI SLATYIFAQVLI FVPLS-LTRNIAKLSGTAL IADLF       | 449 |
| MmQ8BHK3  | 151 | VTQLGFCVVYIVFLADNLKQVVEAVNSTTISCHKNETVLTPTMDSRLYMLSLPVLGLLV-FVRNLRVLTIFSLLANIS    | 229 |
| HsSLC36A2 | 156 | ITQLGFCVVYIVFLADNLKQVVEAVNSTTINCYNETVILTPTMDSRLYMLSLPVLGLLV-LIRNLRILTIFSLLANIS    | 234 |
| CeSKAT-1  | 139 | FYQLGMCVAILFISDNLVNLVGD--H-----LGGTRHQMILMATVSLFPIILLTmFTEMRIVSFALVSSVF           | 205 |
| ScAVT3    | 450 | LLGLVYVYVYiYIIAVNGVADSTMFMNKADNSLFIGTAIFTFPGGLLPIQESMKHKHFRP---SLSAVMCI VAV       | 526 |
| MmQ8BHK3  | 230 | MLVSL-VIIAQ--YIIQEI PDASQLPLVASWKTYPLPFGTAIFSFESIGVVLPLENKMKDARGFPT---ILSLGMSIIT  | 303 |
| HsSLC36A2 | 235 | MLVSL-VIIIQ--YITQEI PDPSRLPLVASWKTYPLPFGTAIFSFESIGVVLPLENKMKNARHFPA---ILSLGMSIVTS | 308 |
| CeSKAT-1  | 206 | FVIG-AAVIMQ--YTVQPNQWDLPAATNFTGTITMIGMSVAFEGQTMILPIENKLDNPAALApfgVLSVTMIICTA      | 282 |
| ScAVT3    | 527 | IFISGGLCYAAGSDVKTVVLLNFQDTSYTLTVQLLYALAILLSTPLQLFPFAIRLENWTFPSNASGKYNPKVKMLKN     | 606 |
| MmQ8BHK3  | 304 | LYIAIGALGYLRFDDIKASITLNLPN-CWLYQSVKLLYVVGILCTYALQFVPAEII---IPLAVSQVSKRWALPVDL     | 378 |
| HsSLC36A2 | 309 | LYIGMALGYLRFDDIKASISLNLPN-CWLYQSVKLLYIAGILCTYALQFVPAEII---IPFAISRVSTRWALPDL       | 383 |
| CeSKAT-1  | 283 | FMTALGFPFGYTFGGSDIAPTITTVNPK-BGLYSTVNVFLMLQSLGNSIAMVYVDMFNGFRFRKGARFPVNVKMLSDK    | 361 |
| ScAVT3    | 607 | YFRCIAIVLTSILAWGANDLDFVSLVGSFACIPLIYIYPPLLHYKASILSGTSRARLLLD---LIVIVFGVAVMAYT     | 682 |
| MmQ8BHK3  | 379 | SIRLALVCLTCLMA-LLIPLRLDLVLSLVGSVSSSALALIIPPLEVVTYVYEGISPLTVTKD-ALISILGFMGFVGTQ    | 456 |
| HsSLC36A2 | 384 | SIRLVMVCLTCLLA-LLIPLRLDLVLSLVGSVSGTALALIIPPLEVVTYVYEGMSPLTIFKD-ALISILGFMGFVGTQ    | 461 |
| CeSKAT-1  | 362 | GFRVFWLVLYLMA-VLIPKLEIMIPLVGVTSGALCALIFPPFEMITFTWDKGLLTYRQRmTKIFINLVMAIGVFAI      | 440 |
| ScAVT3    | 683 | SWQT -IKMNSQ-----                                                                 | 692 |
| MmQ8BHK3  | 457 | ALDE LIKSGNSP-ALNSSTMFIQ                                                          | 478 |
| HsSLC36A2 | 462 | ALDE LLKSEDSH-PFSNSTTFVR                                                          | 483 |
| CeSKAT-1  | 441 | IAGV[6]IIQSFSPQP-----                                                             | 460 |

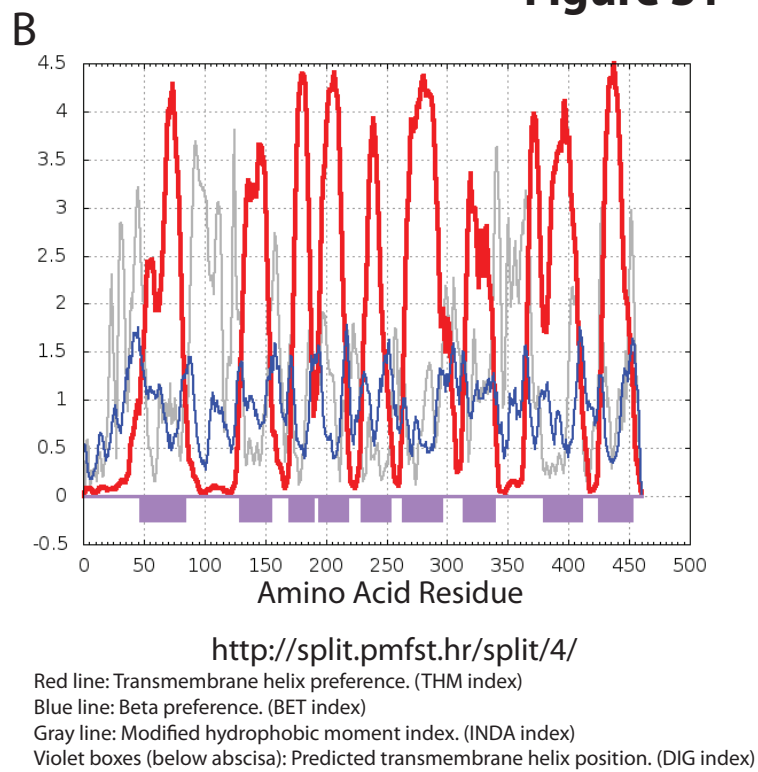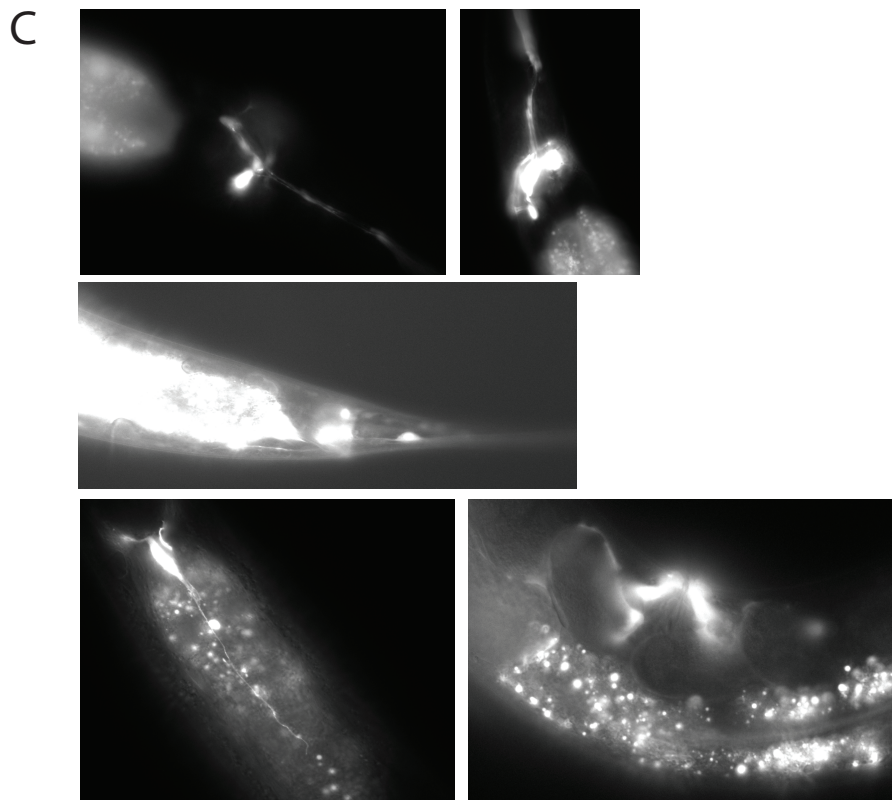

Supplement: pgen.1003908.s001.pdf [file pgen.1003908.s001.pdf]
