# Supplementary material for: Genetic Regulation of Caenorhabditis elegans Lysosome Related Organelle Function
Source: PubMed Central journal article supplement (PMC3812091; doi:10.1371/journal.pgen.1003908), 2013-10-24

A

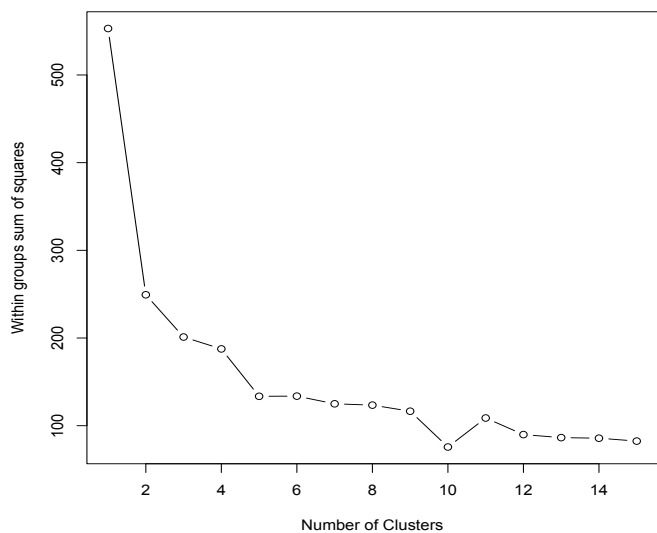

B

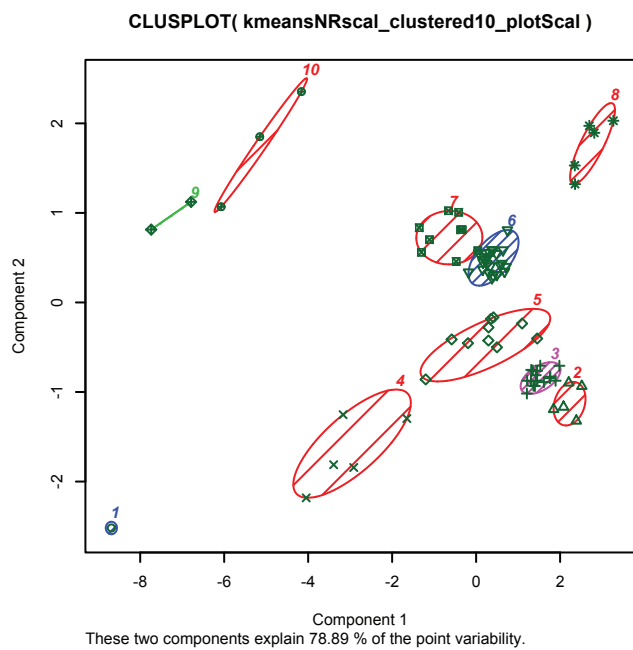

C

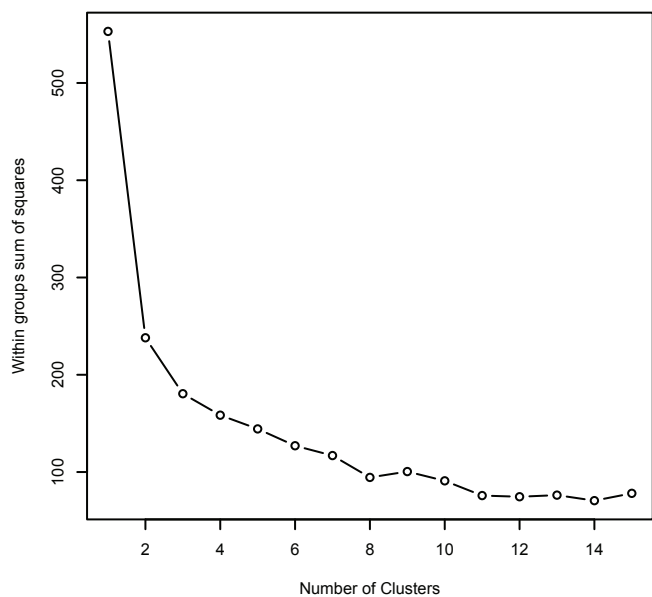

D

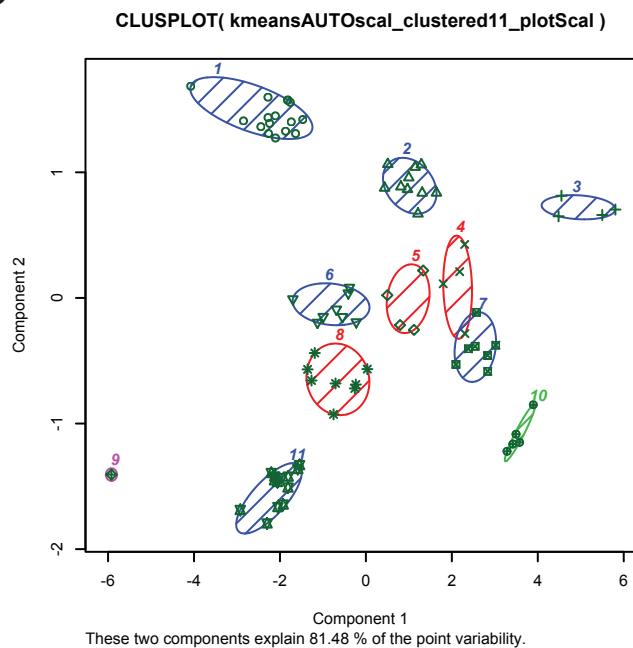

Supplement: pgen.1003908.s004.pdf [file pgen.1003908.s004.pdf]
